# Supplementary material for: A Proteomic Study of the Bioactivity of Annona muricata Leaf Extracts in HT-1080 Fibrosarcoma Cells
Source: MDPI journal article supplement (doi:10.3390/ijms241512021), 2023-07-27
Supplement: s1 [file s1]

**Figure S1.** Network stats and functional enrichment details.

Network Stats

number of nodes: 29

number of edges: 7

average node degree: 0.483

avg. local clustering coefficient: 0.253

expected number of edges: 3

PPI enrichment p-value: 0.0207

Functional enrichments

Biological Process (Gene Ontology)

GO-term

description

count in network

strength

false discovery rate

GO:0010032

Meiotic chromosome condensation

3 of 7

2.46

0.0045

GO:0007076

Mitotic chromosome condensation

3 of 16

2.1

0.0179

Cellular Component (Gene Ontology)

GO-term

description

count in network

strength

false discovery rate

GO:0000797

Condensin core heterodimer

3 of 3

2.83

9.87e-05

GO:0000799

Nuclear condensin complex

2 of 4

2.53

0.0179

Subcellular localization (COMPARTMENTS)

compartment

description

count in network

strength

false discovery rate

GOCC:0000797

Condensin core heterodimer

2 of 2

2.83

0.0098

GOCC:0061814

Condensin I complex

2 of 6

2.35

0.0227

GOCC:0005634

Nucleus

17 of 4636

0.39

0.0227

Annotated Keywords (UniProt)

keyword

description

count in network

strength

false discovery rate

KW-0444

Lipid biosynthesis

4 of 163

1.22

0.0346

For STRING analysis, the minimum required interaction score has been 0.7 (high confidence). The adjacent tables show a network statistics reporting data concerning the number of nodes and edges, the average node degree, the average local clustering coefficient, the expected number of edges, and the protein-protein interaction (PPI) enrichment p-value. Functional enrichment table indicates: (i) Count In Network: the first number indicates how many proteins in your network are annotated with a particular term. The second number indicates how many proteins in total in your network and in the whole genome have this term assigned. (ii) Strength:  $\text{Log}_{10}(\text{observed}/\text{expected})$ . The p-values corrected for multiple testing within each category using the Benjamini-Hochberg procedure are shown.

**Figure S2. *Annona muricata* extracts do not induce ferroptosis.** Representative bright field and fluorescence images of HT1080 treated only with *Annona muricata* DMSO or aqueous extracts, as negative controls of induction of ferroptosis.

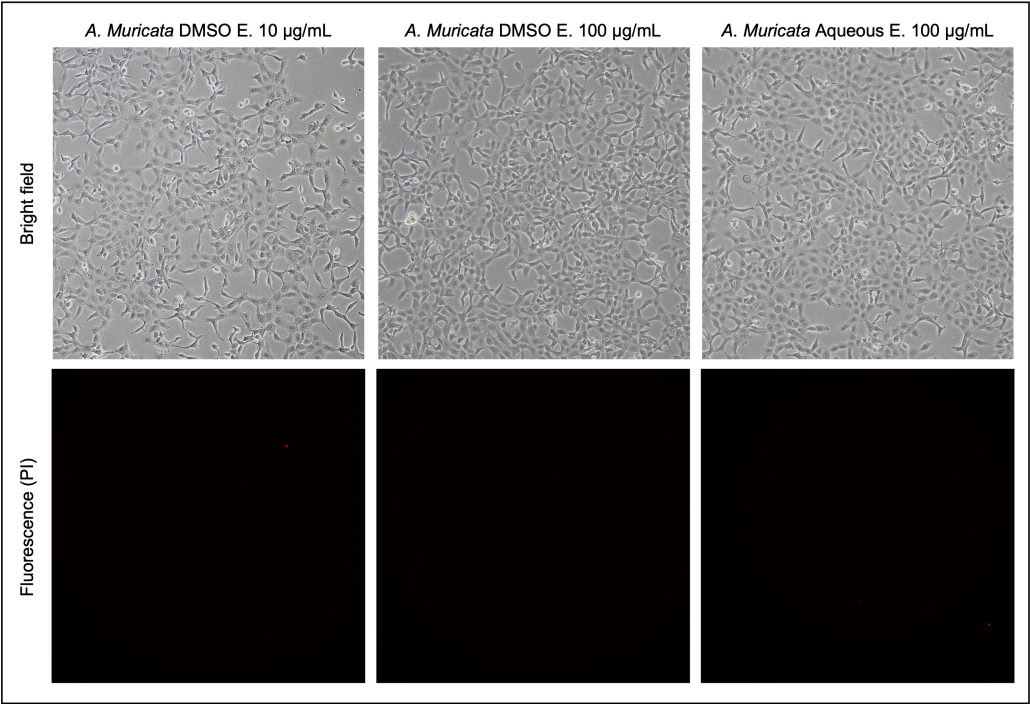

Table S1. Significantly over- and underexpressed proteins in HT1080 cell extracts after treatment with aqueous extract from *Annona muricata*.

| Gene Symbol | UniProt Accession | Description                                                       | Sum PEP score* | Abundance Ratio: Treatment/Control | Abundance Ratio P-Value |
|-------------|-------------------|-------------------------------------------------------------------|----------------|------------------------------------|-------------------------|
| HRNR        | Q86YZ3            | Hornerin [OS=Homo sapiens]                                        | 41,25          | 5,61                               | 0,04728                 |
| PSMD9       | O00233            | 26S proteasome non-ATPase regulatory subunit 9 [OS=Homo sapiens]  | 19,60          | 5,04                               | 0,02041                 |
| NUCB2       | P80303            | Nucleobindin-2 [OS=Homo sapiens]                                  | 8,64           | 4,47                               | 0,02511                 |
| RALB        | P11234            | Ras-related protein Ral-B [OS=Homo sapiens]                       | 13,99          | 3,91                               | 0,03944                 |
| HTATSF1     | O43719            | HIV Tat-specific factor 1 [OS=Homo sapiens]                       | 5,43           | 3,88                               | 0,00092                 |
| SMTN        | P53814            | Smoothelin [OS=Homo sapiens]                                      | 6,82           | 3,42                               | 0,04812                 |
| RPL35A      | P18077            | 60S ribosomal protein L35a [OS=Homo sapiens]                      | 25,15          | 2,95                               | 0,00250                 |
| ATP5IF1     | Q9UII2            | ATPase inhibitor, mitochondrial [OS=Homo sapiens]                 | 4,02           | 2,82                               | 0,02375                 |
| COL4A2      | P08572            | Collagen alpha-2(IV) chain [OS=Homo sapiens]                      | 17,95          | 2,58                               | 0,00661                 |
| AHCYL1      | O43865            | S-adenosylhomocysteine hydrolase-like protein 1 [OS=Homo sapiens] | 21,00          | 2,57                               | 0,00207                 |
|             | Q9NX58            | Cell growth-regulating nucleolar protein [OS=Homo sapiens]        | 9,55           | 2,51                               | 0,03535                 |
| S100A16     | Q96FQ6            | Protein S100-A16 [OS=Homo sapiens]                                | 16,70          | 2,47                               | 0,00114                 |
| STC1        | P52823            | Stanniocalcin-1 [OS=Homo sapiens]                                 | 10,59          | 2,39                               | 0,04756                 |
| HK2         | P52789            | Hexokinase-2 [OS=Homo sapiens]                                    | 20,13          | 2,39                               | 0,02960                 |
| BAG5        | Q9UL15            | BAG family molecular chaperone regulator 5 [OS=Homo sapiens]      | 4,03           | 2,38                               | 0,04229                 |
| RPS28       | P62857            | 40S ribosomal protein S28 [OS=Homo sapiens]                       | 8,01           | 2,37                               | 0,01055                 |
| PPP1R2B     | Q6NXS1            | Protein phosphatase inhibitor 2 family member B [OS=Homo sapiens] | 6,28           | 2,36                               | 0,00214                 |

|         |        |                                                                                                                 |       |      |         |
|---------|--------|-----------------------------------------------------------------------------------------------------------------|-------|------|---------|
| GNG12   | Q9UBI6 | Guanine nucleotide-binding protein G(I)/G(S)/G(O) subunit gamma-12 [OS=Homo sapiens]                            | 12,00 | 2,31 | 0,01577 |
| SNRPC   | P09234 | U1 small nuclear ribonucleoprotein C [OS=Homo sapiens]                                                          | 7,42  | 2,27 | 0,01755 |
| PPIH    | O43447 | Peptidyl-prolyl cis-trans isomerase H [OS=Homo sapiens]                                                         | 10,90 | 2,23 | 0,00150 |
| SMARCE1 | Q969G3 | SWI/SNF-related matrix-associated actin-dependent regulator of chromatin subfamily E member 1 [OS=Homo sapiens] | 7,09  | 2,22 | 0,04804 |
| CLTB    | P09497 | Clathrin light chain B [OS=Homo sapiens]                                                                        | 9,56  | 2,17 | 0,01074 |
| STMN1   | P16949 | Stathmin [OS=Homo sapiens]                                                                                      | 21,27 | 2,17 | 0,01049 |
| BCAR1   | P56945 | Breast cancer anti-estrogen resistance protein 1 [OS=Homo sapiens]                                              | 18,19 | 2,13 | 0,03699 |
| PURB    | Q96QR8 | Transcriptional activator protein Pur-beta [OS=Homo sapiens]                                                    | 19,61 | 2,11 | 0,00134 |
| EIF4B   | P23588 | Eukaryotic translation initiation factor 4B [OS=Homo sapiens]                                                   | 82,28 | 2,06 | 0,01606 |
| RPS17   | P08708 | 40S ribosomal protein S17 [OS=Homo sapiens]                                                                     | 36,77 | 2,05 | 0,01888 |
| COX5B   | P10606 | Cytochrome c oxidase subunit 5B, mitochondrial [OS=Homo sapiens]                                                | 18,89 | 2,05 | 0,01385 |
| S100A6  | P06703 | Protein S100-A6 [OS=Homo sapiens]                                                                               | 7,35  | 2,05 | 0,04501 |
| TFRC    | P02786 | Transferrin receptor protein 1 [OS=Homo sapiens]                                                                | 91,93 | 2,02 | 0,00087 |
| GRIPAP1 | Q4V328 | GRIP1-associated protein 1 [OS=Homo sapiens]                                                                    | 4,27  | 2,01 | 0,03573 |
| PCNP    | Q8WW12 | PEST proteolytic signal-containing nuclear protein [OS=Homo sapiens]                                            | 16,90 | 2,00 | 0,01940 |
| NIF3L1  | Q9GZT8 | NIF3-like protein 1 [OS=Homo sapiens]                                                                           | 13,93 | 0,50 | 0,01253 |
| WARS1   | P23381 | Tryptophan--tRNA ligase, cytoplasmic [OS=Homo sapiens]                                                          | 75,70 | 0,49 | 0,02655 |

|         |        |                                                                                                    |       |      |         |
|---------|--------|----------------------------------------------------------------------------------------------------|-------|------|---------|
| EIF2B2  | P49770 | Translation initiation factor eIF-2B subunit beta [OS=Homo sapiens]                                | 16,29 | 0,48 | 0,04503 |
| RPAP3   | Q9H6T3 | RNA polymerase II-associated protein 3 [OS=Homo sapiens]                                           | 10,51 | 0,48 | 0,00499 |
| LACTB   | P83111 | Serine beta-lactamase-like protein LACTB, mitochondrial [OS=Homo sapiens]                          | 8,74  | 0,47 | 0,00207 |
| CUL2    | Q13617 | Cullin-2 [OS=Homo sapiens]                                                                         | 33,84 | 0,47 | 0,00254 |
| SMU1    | Q2TAY7 | WD40 repeat-containing protein SMU1 [OS=Homo sapiens]                                              | 18,33 | 0,46 | 0,01453 |
| POLDIP2 | Q9Y2S7 | Polymerase delta-interacting protein 2 [OS=Homo sapiens]                                           | 13,00 | 0,46 | 0,01877 |
| AXL     | P30530 | Tyrosine-protein kinase receptor UFO [OS=Homo sapiens]                                             | 8,93  | 0,45 | 0,00997 |
| EIF3D   | O15371 | Eukaryotic translation initiation factor 3 subunit D [OS=Homo sapiens]                             | 43,15 | 0,45 | 0,00111 |
| PPP2R1B | P30154 | Serine/threonine-protein phosphatase 2A 65 kDa regulatory subunit A beta isoform [OS=Homo sapiens] | 18,22 | 0,45 | 0,01004 |
| DYNLL1  | P63167 | Dynein light chain 1, cytoplasmic [OS=Homo sapiens]                                                | 18,53 | 0,45 | 0,00182 |
| SLC20A1 | Q8WUM9 | Sodium-dependent phosphate transporter 1 [OS=Homo sapiens]                                         | 10,75 | 0,44 | 0,00768 |
| TYMS    | P04818 | Thymidylate synthase [OS=Homo sapiens]                                                             | 19,39 | 0,44 | 0,01364 |
| RAB27B  | O00194 | Ras-related protein Rab-27B [OS=Homo sapiens]                                                      | 16,14 | 0,44 | 0,00371 |
| PRRC2A  | P48634 | Protein PRRC2A [OS=Homo sapiens]                                                                   | 13,89 | 0,43 | 0,03776 |
| MRPS16  | Q9Y3D3 | 28S ribosomal protein S16, mitochondrial [OS=Homo sapiens]                                         | 5,31  | 0,43 | 0,00397 |
|         | Q16850 | Lanosterol 14-alpha demethylase [OS=Homo sapiens]                                                  | 32,21 | 0,43 | 0,00078 |
| PPME1   | Q9Y570 | Protein phosphatase methylesterase 1 [OS=Homo sapiens]                                             | 9,37  | 0,41 | 0,02185 |

|          |        |                                                                                               |       |      |         |
|----------|--------|-----------------------------------------------------------------------------------------------|-------|------|---------|
| PDP1     | Q9P0J1 | [Pyruvate dehydrogenase [acetyl-transferring]]-phosphatase 1, mitochondrial [OS=Homo sapiens] | 41,19 | 0,40 | 0,00348 |
| NDUFS3   | O75489 | NADH dehydrogenase [ubiquinone] iron-sulfur protein 3, mitochondrial [OS=Homo sapiens]        | 26,21 | 0,40 | 0,02990 |
| KDM1A    | O60341 | Lysine-specific histone demethylase 1A [OS=Homo sapiens]                                      | 11,52 | 0,39 | 0,00135 |
| BLMH     | Q13867 | Bleomycin hydrolase [OS=Homo sapiens]                                                         | 20,12 | 0,39 | 0,00111 |
| NCAPD2   | Q15021 | Condensin complex subunit 1 [OS=Homo sapiens]                                                 | 7,70  | 0,39 | 0,02709 |
| ADI1     | Q9BV57 | 1,2-dihydroxy-3-keto-5-methylthiopentene dioxygenase [OS=Homo sapiens]                        | 12,31 | 0,39 | 0,02647 |
| KDSR     | Q06136 | 3-ketodihydrosphingosine reductase [OS=Homo sapiens]                                          | 6,79  | 0,38 | 0,00934 |
| MYEF2    | Q9P2K5 | Myelin expression factor 2 [OS=Homo sapiens]                                                  | 9,70  | 0,38 | 0,00447 |
| MVK      | Q03426 | Mevalonate kinase [OS=Homo sapiens]                                                           | 17,79 | 0,38 | 0,01204 |
| EXOSC2   | Q13868 | Exosome complex component RRP4 [OS=Homo sapiens]                                              | 16,72 | 0,37 | 0,00136 |
| FASTKD2  | Q9NYY8 | FAST kinase domain-containing protein 2, mitochondrial [OS=Homo sapiens]                      | 6,20  | 0,37 | 0,00468 |
| SLC39A14 | Q15043 | Metal cation symporter ZIP14 [OS=Homo sapiens]                                                | 9,83  | 0,35 | 0,00105 |
| SPTBN2   | O15020 | Spectrin beta chain, non-erythrocytic 2 [OS=Homo sapiens]                                     | 14,15 | 0,34 | 0,03169 |
| BCAP29   | Q9UHQ4 | B-cell receptor-associated protein 29 [OS=Homo sapiens]                                       | 9,85  | 0,33 | 0,02658 |
| NOC4L    | Q9BVI4 | Nucleolar complex protein 4 homolog [OS=Homo sapiens]                                         | 5,28  | 0,33 | 0,03488 |
| HAT1     | O14929 | Histone acetyltransferase type B catalytic subunit [OS=Homo sapiens]                          | 14,64 | 0,31 | 0,01274 |

|        |        |                                                                                  |       |      |         |
|--------|--------|----------------------------------------------------------------------------------|-------|------|---------|
| FTH1   | P02794 | Ferritin heavy chain [OS=Homo sapiens]                                           | 22,66 | 0,26 | 0,00028 |
| PPAT   | Q06203 | Amidophosphoribosyltransferase [OS=Homo sapiens]                                 | 15,53 | 0,26 | 0,00205 |
| UACA   | Q9BZF9 | Uveal autoantigen with coiled-coil domains and ankyrin repeats [OS=Homo sapiens] | 5,70  | 0,24 | 0,01286 |
| CDH2   | P19022 | Cadherin-2 [OS=Homo sapiens]                                                     | 7,21  | 0,23 | 0,02434 |
| MAPK9  | P45984 | Mitogen-activated protein kinase 9 [OS=Homo sapiens]                             | 4,86  | 0,22 | 0,00203 |
| ESF1   | Q9H501 | ESF1 homolog [OS=Homo sapiens]                                                   | 7,14  | 0,22 | 0,00001 |
| UBA5   | Q9GZZ9 | Ubiquitin-like modifier-activating enzyme 5 [OS=Homo sapiens]                    | 10,44 | 0,21 | 0,00201 |
| PIGS   | Q96S52 | GPI transamidase component PIG-S [OS=Homo sapiens]                               | 5,77  | 0,21 | 0,02276 |
| THBS1  | P07996 | Thrombospondin-1 [OS=Homo sapiens]                                               | 38,46 | 0,20 | 0,00228 |
| AATF   | Q9NY61 | Protein AATF [OS=Homo sapiens]                                                   | 10,13 | 0,18 | 0,04332 |
| FADS2  | O95864 | Acyl-CoA 6-desaturase [OS=Homo sapiens]                                          | 34,42 | 0,18 | 0,01124 |
| FAM98A | Q8NCA5 | Protein FAM98A [OS=Homo sapiens]                                                 | 13,98 | 0,16 | 0,04574 |
| PITRM1 | Q5JRX3 | Presequence protease, mitochondrial [OS=Homo sapiens]                            | 6,60  | 0,10 | 0,00192 |
| CEMIP2 | Q9UHN6 | Cell surface hyaluronidase [OS=Homo sapiens]                                     | 7,00  | 0,06 | 0,00016 |

\*The sum PEP score corresponds to the score calculated based on the posterior error probability (PEP) values of the peptide spectrum matches (PSM). The PEP indicates the probability that an observed PSM is a random event. Sum PEP score is calculated as the negative logarithms of the PEP values of the connected PSM.

Table S2. Significantly over- and underexpressed proteins in HT1080 cell extracts after treatment with DMSO extract from *Annona muricata*.

| Gene Symbol | UniProt Accession | Description                                                                                                      | Sum PEP score* | Abundance Ratio: Treatment/Control | Abundance Ratio P-Value |
|-------------|-------------------|------------------------------------------------------------------------------------------------------------------|----------------|------------------------------------|-------------------------|
| WDR26       | Q9H7D7            | WD repeat-containing protein 26 [OS=Homo sapiens]                                                                | 10,82          | 19,30                              | 0,00046                 |
| RALB        | P11234            | Ras-related protein Ral-B [OS=Homo sapiens]                                                                      | 11,74          | 3,41                               | 0,02986                 |
| SLC7A11     | Q9UPY5            | Cystine/glutamate transporter [OS=Homo sapiens]                                                                  | 5,22           | 3,01                               | 0,04369                 |
| CHCHD2P9    | Q5T1J5            | Putative coiled-coil-helix-coiled-coil-helix domain-containing protein CHCHD2P9, mitochondrial [OS=Homo sapiens] | 8,09           | 2,68                               | 0,02272                 |
| MRPS5       | P82675            | 28S ribosomal protein S5, mitochondrial [OS=Homo sapiens]                                                        | 10,09          | 2,44                               | 0,01895                 |
| HRNR        | Q86YZ3            | Hornerin [OS=Homo sapiens]                                                                                       | 28,83          | 2,43                               | 0,04102                 |
| SAAL1       | Q96ER3            | Protein SAAL1 [OS=Homo sapiens]                                                                                  | 5,85           | 2,33                               | 0,01740                 |
| GOLPH3      | Q9H4A6            | Golgi phosphoprotein 3 [OS=Homo sapiens]                                                                         | 7,98           | 2,30                               | 0,04552                 |
|             | Q9NX58            | Cell growth-regulating nucleolar protein [OS=Homo sapiens]                                                       | 14,48          | 2,27                               | 0,03416                 |
| ASPSR1      | Q9BZE9            | Tether containing UBX domain for GLUT4 [OS=Homo sapiens]                                                         | 5,38           | 2,20                               | 0,03274                 |
| H1-10       | Q92522            | Histone H1.10 [OS=Homo sapiens]                                                                                  | 17,93          | 2,17                               | 0,00512                 |
| UPP1        | Q16831            | Uridine phosphorylase 1 [OS=Homo sapiens]                                                                        | 5,85           | 2,14                               | 0,02702                 |
| SREK1       | Q8WXA9            | Splicing regulatory glutamine/lysine-rich protein 1 [OS=Homo sapiens]                                            | 15,75          | 2,10                               | 0,03789                 |
| SNX5        | Q9Y5X3            | Sorting nexin-5 [OS=Homo sapiens]                                                                                | 21,40          | 2,09                               | 0,03354                 |
| SLC2A3      | P11169            | Solute carrier family 2, facilitated glucose transporter member 3 [OS=Homo sapiens]                              | 10,56          | 2,06                               | 0,04256                 |
| SMC2        | O95347            | Structural maintenance of chromosomes protein 2 [OS=Homo sapiens]                                                | 50,27          | 0,50                               | 0,01179                 |



|           |        |                                                                                                    |       |      |         |
|-----------|--------|----------------------------------------------------------------------------------------------------|-------|------|---------|
| EIF2B4    | Q9UI10 | Translation initiation factor eIF-2B subunit delta [OS=Homo sapiens]                               | 6,19  | 0,49 | 0,00250 |
| ANKRD28   | O15084 | Serine/threonine-protein phosphatase 6 regulatory ankyrin repeat subunit A [OS=Homo sapiens]       | 8,69  | 0,49 | 0,01278 |
| THBS1     | P07996 | Thrombospondin-1 [OS=Homo sapiens]                                                                 | 38,49 | 0,47 | 0,00775 |
| NOSIP     | Q9Y314 | Nitric oxide synthase-interacting protein [OS=Homo sapiens]                                        | 15,77 | 0,47 | 0,02365 |
| PPP2R1B   | P30154 | Serine/threonine-protein phosphatase 2A 65 kDa regulatory subunit A beta isoform [OS=Homo sapiens] | 18,75 | 0,46 | 0,01657 |
| SPARC     | P09486 | SPARC [OS=Homo sapiens]                                                                            | 12,17 | 0,46 | 0,00498 |
| MYEF2     | Q9P2K5 | Myelin expression factor 2 [OS=Homo sapiens]                                                       | 9,60  | 0,45 | 0,00547 |
| FADS1     | O60427 | Acyl-CoA (8-3)-desaturase [OS=Homo sapiens]                                                        | 7,29  | 0,45 | 0,01636 |
| KPNA2     | P52292 | Importin subunit alpha-1 [OS=Homo sapiens]                                                         | 39,57 | 0,45 | 0,01288 |
| SRRM1     | Q8IYB3 | Serine/arginine repetitive matrix protein 1 [OS=Homo sapiens]                                      | 16,12 | 0,45 | 0,02866 |
| HAT1      | O14929 | Histone acetyltransferase type B catalytic subunit [OS=Homo sapiens]                               | 15,76 | 0,45 | 0,00559 |
| SMC4      | Q9NTJ3 | Structural maintenance of chromosomes protein 4 [OS=Homo sapiens]                                  | 41,05 | 0,43 | 0,00510 |
| RAB3GAP 1 | Q15042 | Rab3 GTPase-activating protein catalytic subunit [OS=Homo sapiens]                                 | 5,27  | 0,42 | 0,02826 |
| CSNK1A1   | P48729 | Casein kinase I isoform alpha [OS=Homo sapiens]                                                    | 8,56  | 0,41 | 0,01953 |
| MVK       | Q03426 | Mevalonate kinase [OS=Homo sapiens]                                                                | 17,65 | 0,40 | 0,00916 |
| CC2D1B    | Q5T0F9 | Coiled-coil and C2 domain-containing protein 1B [OS=Homo sapiens]                                  | 5,75  | 0,39 | 0,00035 |
| FAM98A    | Q8NCA5 | Protein FAM98A [OS=Homo sapiens]                                                                   | 13,47 | 0,38 | 0,03535 |
|           | Q16850 | Lanosterol 14-alpha demethylase [OS=Homo sapiens]                                                  | 31,95 | 0,36 | 0,00639 |

|          |        |                                                                  |       |      |         |
|----------|--------|------------------------------------------------------------------|-------|------|---------|
| CHD4     | Q14839 | Chromodomain-helicase-DNA-binding protein 4 [OS=Homo sapiens]    | 8,98  | 0,36 | 0,04954 |
| FADS2    | O95864 | Acyl-CoA 6-desaturase [OS=Homo sapiens]                          | 35,16 | 0,35 | 0,00546 |
| DIDO1    | Q9BTC0 | Death-inducer obliterator 1 [OS=Homo sapiens]                    | 5,28  | 0,34 | 0,00257 |
| NCAPD2   | Q15021 | Condensin complex subunit 1 [OS=Homo sapiens]                    | 9,25  | 0,31 | 0,00074 |
| CD63     | P08962 | CD63 antigen [OS=Homo sapiens]                                   | 7,09  | 0,30 | 0,00134 |
| PLSCR1   | O15162 | Phospholipid scramblase 1 [OS=Homo sapiens]                      | 4,51  | 0,25 | 0,02525 |
| PRRC2A   | P48634 | Protein PRRC2A [OS=Homo sapiens]                                 | 13,90 | 0,23 | 0,00973 |
| CDK4     | P11802 | Cyclin-dependent kinase 4 [OS=Homo sapiens]                      | 8,95  | 0,20 | 0,01429 |
| HNRNP LL | Q8WVV9 | Heterogeneous nuclear ribonucleoprotein L-like [OS=Homo sapiens] | 4,61  | 0,18 | 0,00573 |
| RUNX1    | Q01196 | Runt-related transcription factor 1 [OS=Homo sapiens]            | 7,27  | 0,07 | 0,00663 |
| IGHM     | P01871 | Immunoglobulin heavy constant mu [OS=Homo sapiens]               | 52,10 | 0,02 | 0,01076 |

\*The sum PEP score corresponds to the score calculated based on the posterior error probability (PEP) values of the peptide spectrum matches (PSM). The PEP indicates the probability that an observed PSM is a random event. Sum PEP score is calculated as the negative logarithms of the PEP values of the connected PSM.

Table S3. Significantly over- and underexpressed proteins in HT1080 culture media after treatment with aqueous extract from *Annona muricata*.

| Gene Symbol  | UniProt Accession | Description                                                              | Sum PEP score* | Abundance Ratio: Treatment/Control | Abundance Ratio P-Value |
|--------------|-------------------|--------------------------------------------------------------------------|----------------|------------------------------------|-------------------------|
| SEMA3A       | Q14563            | Semaphorin-3A [OS=Homo sapiens]                                          | 14,22          | 4,55                               | 0,01135                 |
| LRRC17       | Q8N6Y2            | Leucine-rich repeat-containing protein 17 [OS=Homo sapiens]              | 14,30          | 3,65                               | 0,00028                 |
| SEMA3C       | Q99985            | Semaphorin-3C [OS=Homo sapiens]                                          | 42,14          | 3,51                               | 0,03081                 |
| DIPK2A       | Q8NDZ4            | Divergent protein kinase domain 2A [OS=Homo sapiens]                     | 8,83           | 2,76                               | 0,01231                 |
| GDF15        | Q99988            | Growth/differentiation factor 15 [OS=Homo sapiens]                       | 164,70         | 2,69                               | 0,00044                 |
| HHIP         | Q96QV1            | Hedgehog-interacting protein [OS=Homo sapiens]                           | 79,59          | 2,52                               | 0,00002                 |
| THSD4        | Q6ZMP0            | Thrombospondin type-1 domain-containing protein 4 [OS=Homo sapiens]      | 58,47          | 2,46                               | 0,00439                 |
| GLG1         | Q92896            | Golgi apparatus protein 1 [OS=Homo sapiens]                              | 94,17          | 2,18                               | 0,00222                 |
| CEMIP        | Q8WUJ3            | Cell migration-inducing and hyaluronan-binding protein [OS=Homo sapiens] | 241,80         | 2,07                               | 0,00078                 |
| S100A8       | P05109            | Protein S100-A8 [OS=Homo sapiens]                                        | 12,49          | 0,42                               | 0,02702                 |
| AZGP1        | P25311            | Zinc-alpha-2-glycoprotein [OS=Homo sapiens]                              | 9,70           | 0,41                               | 0,04529                 |
| FTH1         | P02794            | Ferritin heavy chain [OS=Homo sapiens]                                   | 24,01          | 0,35                               | 0,00644                 |
| H4C_         | P62805            | Histone H4 [OS=Homo sapiens]                                             | 101,56         | 0,29                               | 0,04128                 |
| H3-3A; H3-3B | P84243            | Histone H3.3 [OS=Homo sapiens]                                           | 17,46          | 0,27                               | 0,00124                 |
| FTL          | P02792            | Ferritin light chain [OS=Homo sapiens]                                   | 20,99          | 0,21                               | 0,01911                 |

\*The sum PEP score corresponds to the score calculated based on the posterior error probability (PEP) values of the peptide spectrum matches (PSM). The PEP indicates the probability that an observed PSM is a random event. Sum PEP score is calculated as the negative logarithms of the PEP values of the connected PSM.

Table S4. Significantly over- and underexpressed proteins in HT1080 culture media after treatment with DMSO extract from *Annona muricata*.

| Gene Symbol | UniProt Accession | Description                                                         | Sum PEP score* | Abundance Ratio: Treatment/Control | Abundance Ratio P-Value |
|-------------|-------------------|---------------------------------------------------------------------|----------------|------------------------------------|-------------------------|
| ERAP1       | Q9NZ08            | Endoplasmic reticulum aminopeptidase 1 [OS=Homo sapiens]            | 86,35          | 4,38                               | 0,00399                 |
| FAU         | P62861            | 40S ribosomal protein S30 [OS=Homo sapiens]                         | 11,62          | 3,57                               | 0,02734                 |
| YBX1        | P67809            | Y-box-binding protein 1 [OS=Homo sapiens]                           | 118,34         | 2,18                               | 0,02061                 |
| TNFSF9      | P41273            | Tumor necrosis factor ligand superfamily member 9 [OS=Homo sapiens] | 7,56           | 0,49                               | 0,03410                 |
| CHID1       | Q9BWS9            | Chitinase domain-containing protein 1 [OS=Homo sapiens]             | 20,03          | 0,43                               | 0,03206                 |
| CALU        | O43852            | Calumenin [OS=Homo sapiens]                                         | 76,54          | 0,43                               | 0,00473                 |
| TSKU        | Q8WUA8            | Tsukushi [OS=Homo sapiens]                                          | 29,73          | 0,39                               | 0,02649                 |
| NOG         | Q13253            | Noggin [OS=Homo sapiens]                                            | 45,75          | 0,27                               | 0,04310                 |

\*The sum PEP score corresponds to the score calculated based on the posterior error probability (PEP) values of the peptide spectrum matches (PSM). The PEP indicates the probability that an observed PSM is a random event. Sum PEP score is calculated as the negative logarithms of the PEP values of the connected PSM.

Table S5. List of bio-active compounds previously identified by us in both aqueous and DMSO *Annona muricata* leaf extracts.

| <b>Aqueous extract</b>           | <b>DMSO extract</b> |
|----------------------------------|---------------------|
| Annoionoside                     | Anonaine            |
| Argentinine                      | Chlorogenic acid    |
| Catechin                         | Coclaurine          |
| Chlorogenic acid                 | Corossolone         |
| Isolaureline                     | Isolaureline        |
| Isoquercetin                     | Isoquercetin        |
| Isoquercetin                     | Kaempferol          |
| Kaempferol                       | Loliolide           |
| Kaempferol-3- <i>O</i> -rutoside | Norcorydine         |
| Loliolide                        | Quercetin           |
| Norcorydine                      | Reticuline          |
| Quercetin                        | Rutin               |
| Reticuline                       | Xylopin             |
| Rutin                            |                     |
| Stepharine                       |                     |
| Vomifoliol                       |                     |

*These compounds were identified by UHPLC-HRMS according to the procedures described in [7].*
